# Supplementary material
Source: MDPI journal article supplement (https://www.mdpi.com/2071-1050/12/18/7280)
Supplement: s1 [file s1]

## Sheet: Table S1
gene	JD-China ka/Ks	SC-China Ka/Ks	JD-SC Ka/Ks
atp6	0	0.0600227	0.0599548
atp8	0	0.548276	0.269625
atp9	0	0	0
cob	0	0.045815	0.0474453
cox1	0	0.0262605	0.0254582
cox2	0.363636	0.276596	0.264786
cox3	0	0	0.024961
nad1	0	0	0
nad2	0	0.0709291	0.0785398
nad3	0	0.0424528	0.0497925
nad4	0	0.0695652	0.0694897
nad4L	0	0	0
nad5	0.619048	0.0304414	0.0298507
nad6	0	0.162393	0.180749
nad7	0	0.00904605	0.00904605
nad9	0	0.0496689	0.0496689
nad11	0.3	0.0235955	0
orf41	0	0.405476	0.405476
orf129	0	0.25	0.25
tatC	0	0.114394	0.111657

## Sheet: Table S2
gene	JD-China Ka/Ks	SC-China Ka/Ks	JD-SC Ka/Ks
acsF	0	0.178295	0.0852713
atpA	0	0	0
atpB	0	0	0
atpD	0	0.14	0.14
atpE	0	0	0
atpF	0	0.263736	0.263736
atpG	0	0	0
atpH	0	0	0
atpI	0	0	0
cbbx	0	0	0
ccs1	0	0.188679	0.188679
ccsA	0	0	0
chlB	0	0.136612	0.164474
chlI	0	0.0481481	0.0479705
chlL	0	0.107143	0.107143
chlN	0	0.0447761	0.0382979
clpC	0	0	0
dnaB	1.73333	0.18125	0.218045
dnaK	0	0.058651	0.0381232
ftrB	0	0	0
ftsH	0	0	0
groEL	0	0.0569395	0.0569395
ilvB	0	0.0485437	0.0416667
ilvH	0	0.148352	0.148352
orf219	0	0	0
orf467	3.88889	0.174033	0.166154
petA	0	0.290323	0.290323
petB	0	0	0
petD	0	0	0
petF	0	1.19048	0.292517
petG	0	0	0
petJ	0	0.142857	0.142857
petL	0	0	0
petM	0	0	0
petN	0	0	0
psaA	0	0	0
psaB	0	0	0
psaC	0	0	0
psaD	0	0	0
psaE	0	0.101744	0.101744
psaF	0	0.072327	0.072327
psaI	0.680798	5.94012	0
psaJ	0	0	0
psaL	0	0	0
psaM	0	0	0
psb28	0	0	0
psbA	0	0	0
psbB	0	0	0
psbC	0	0	0
psbD	0	0	0
psbE	0	0	0
psbF	0	0	0
psbH	0	0	0
psbI	0	0	0
psbJ	0	0	0
psbK	0	0	0
psbL	0	0	0
psbN	0	0	0
psbT	0	0	0
psbV	0	0	0
psbX	0	0	0
psbY	0	0	0
rbcL	0	0.482143	0.482143
rbcR	0	0.0460526	0.0460526
rbcS	0	0	0
rpoA	0	0.571429	0.571429
rpoB	0	0.0511628	0.0697674
rpoC1	0	0.0316742	0.0316742
rpoC2	0	0.0833333	0.0797342
secA	3.6	0.0371747	0.0174216
secY	0	0.151515	0.151515
sufB	0	0	0
sufC	0	0	0
tatC	0	0.0714286	0.0714286
thiG	0	0.195122	0.195122
thiS	0	0	0
tsf	0	0	0
tufA	0	0.0317919	0.0353698
ycf3	0	0	0
ycf4	0	0	0
ycf12	0	0	0
ycf19	0	0	0
ycf33	0	0	0
ycf34	0	0.13806	0.13806
ycf35	0	0	0
ycf37	0	0	0
ycf39	0	0	0
ycf41	0	0	0.282209
ycf42	0	0	0
ycf46	0	0	0
ycf47	0	0	0
ycf54	0	0	0
ycf65	0	0.160173	0.160173
ycf66	0	0	0
